# Supplementary material for: Fabrication and enhanced photoelectric properties of a novel Bi9O7.5S6/CdS composite film
Source: Royal Society of Chemistry journal article supplement (doi:10.1039/d2dt02931f), 2022-01-01
Supplement: d2dt02931f1.pdf [file d2dt02931f1.pdf]

Supplementary information for:

## **Fabrication and enhanced photoelectric properties of novel Bi<sub>9</sub>O<sub>7.5</sub>S<sub>6</sub>/CdS composite film**

**Yongzheng Fang,<sup>a</sup> Jing Wang,<sup>a</sup> Zhanqiang Liu,<sup>b</sup> Guoying Zhao,<sup>a</sup> Yanwei Huang,<sup>a</sup> Jingshan Hou<sup>a,\*</sup> and Ganghua Zhang<sup>a,\*</sup>**

*<sup>a</sup>School of Materials Science and Engineering, Shanghai Institute of Technology, Shanghai, 201418, P. R. China;*

*<sup>b</sup>Department of Materials Chemistry, Huzhou University, 759 East Erhuan Road, Huzhou 313000, P. R. China.*

***Emails:*** [houjingshan@sit.edu.cn](mailto:houjingshan@sit.edu.cn) (J.S. Hou) and [ganghuazhang@sit.edu.cn](mailto:ganghuazhang@sit.edu.cn) (G.H. Zhang)

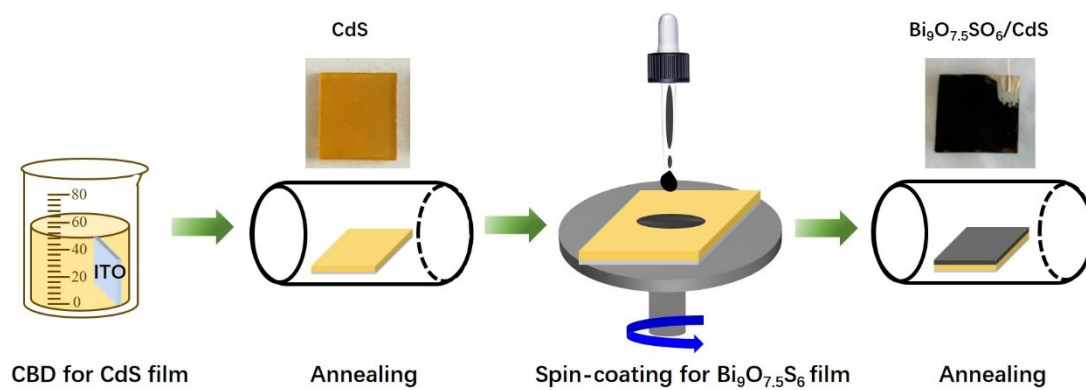

**Fig. S1** Schematic illustration of the preparation of  $\text{Bi}_9\text{O}_{7.5}\text{S}_6/\text{CdS}/\text{ITO}$  composite film.

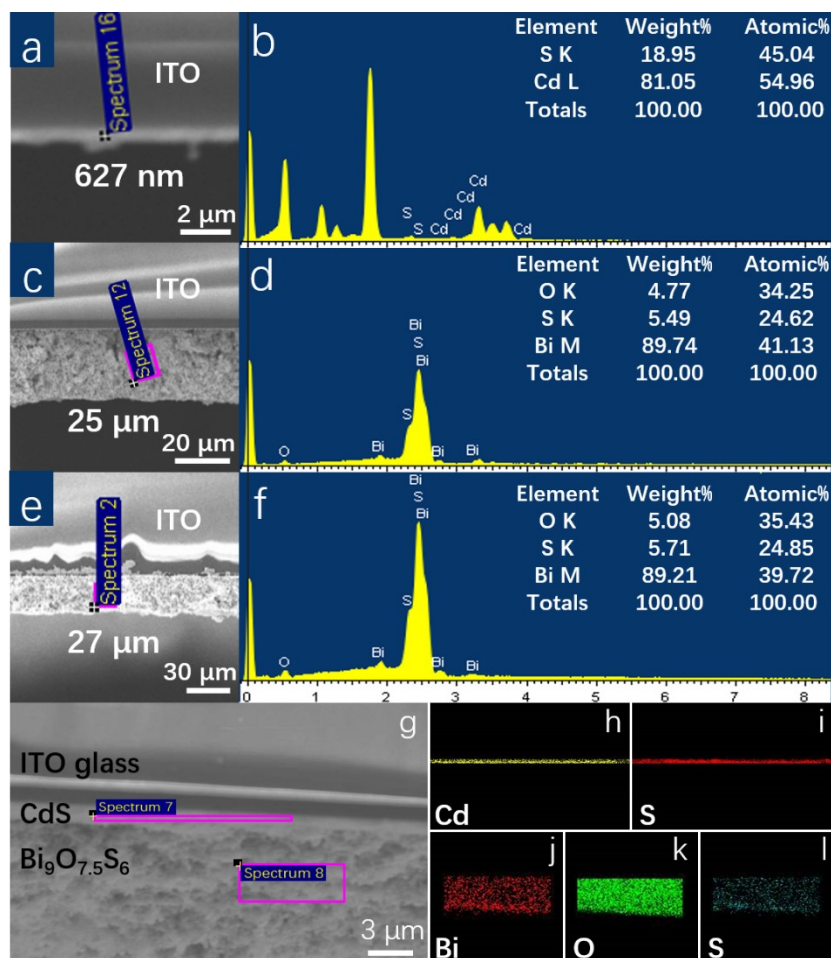

**Fig. S2** Cross-sectional SEM images and EDS results of CdS/ITO (a, b), Bi<sub>9</sub>O<sub>7.5</sub>S<sub>6</sub>/ITO (c, d) and Bi<sub>9</sub>O<sub>7.5</sub>S<sub>6</sub>/CdS/ITO (e, f) films. SEM (g) and EDS mapping (h-l) images of Bi<sub>9</sub>O<sub>7.5</sub>S<sub>6</sub>/CdS heterostructure at the cross-section.

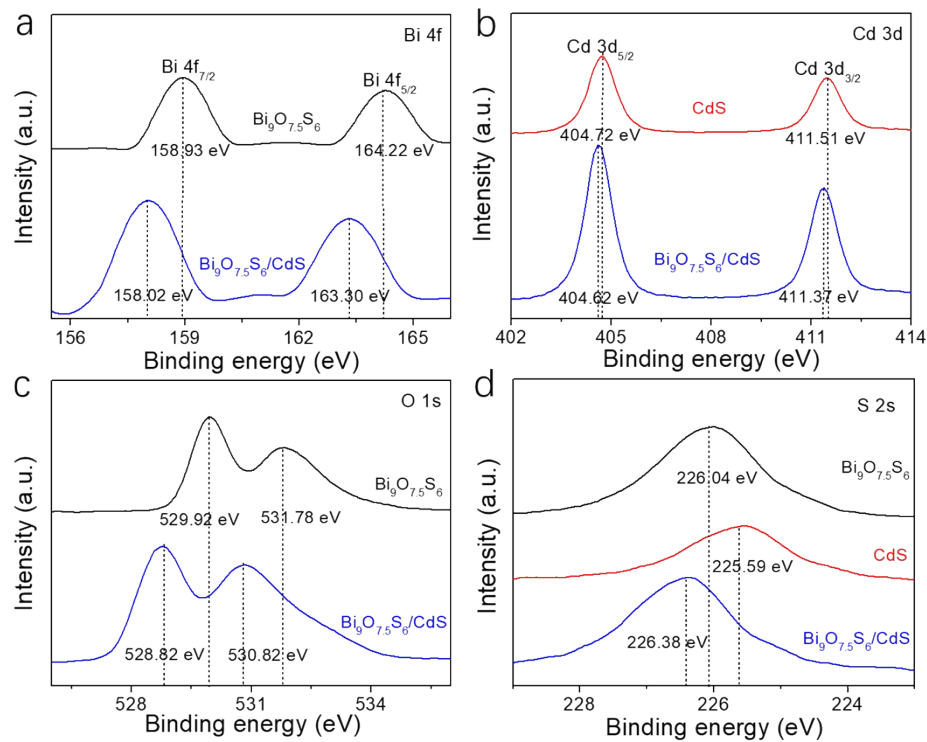

**Fig. S3** XPS spectra of Bi<sub>9</sub>O<sub>7.5</sub>S<sub>6</sub>, CdS and Bi<sub>9</sub>O<sub>7.5</sub>S<sub>6</sub>/CdS: (a) Bi 4f, (b) Cd 3d, (c) O 1s and (d) S 2s spectra.

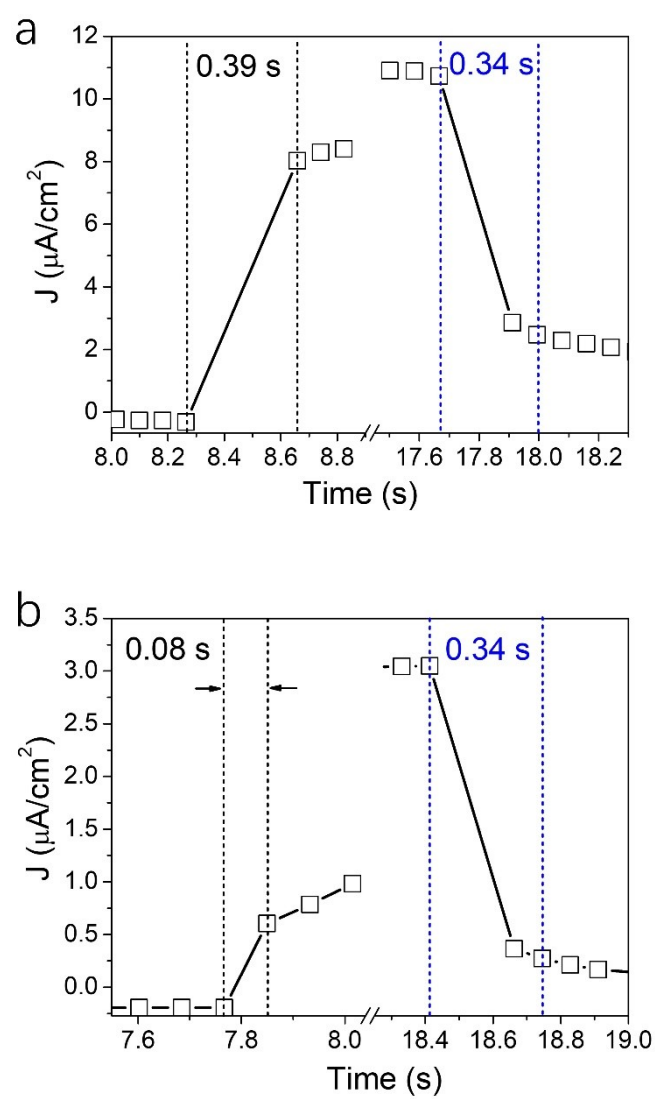

**Fig. S4** Response times of CdS/ITO (a) and  $\text{Bi}_9\text{O}_{7.5}\text{S}_6/\text{ITO}$  (b) films at 1 V bias voltage.

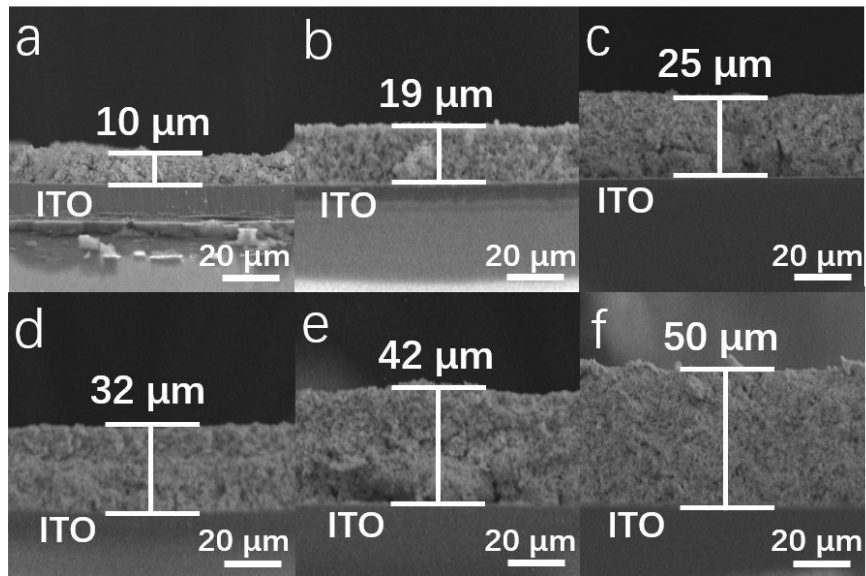

**Fig. S5** Cross-sectional SEM images of Bi<sub>9</sub>O<sub>7.5</sub>S<sub>6</sub>/ITO films with different thicknesses.

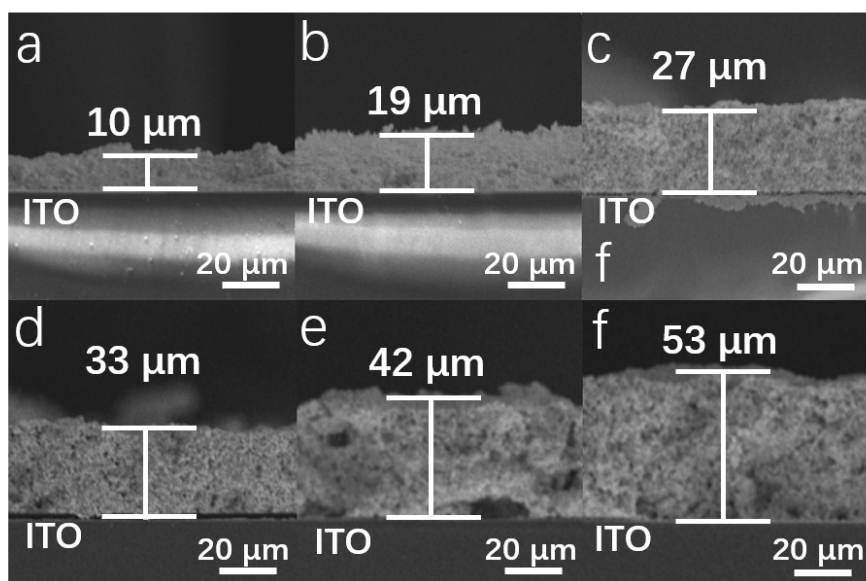

**Fig. S6** Cross-sectional SEM images of  $\text{Bi}_9\text{O}_{7.5}\text{S}_6/\text{CdS}/\text{ITO}$  films with different thicknesses.

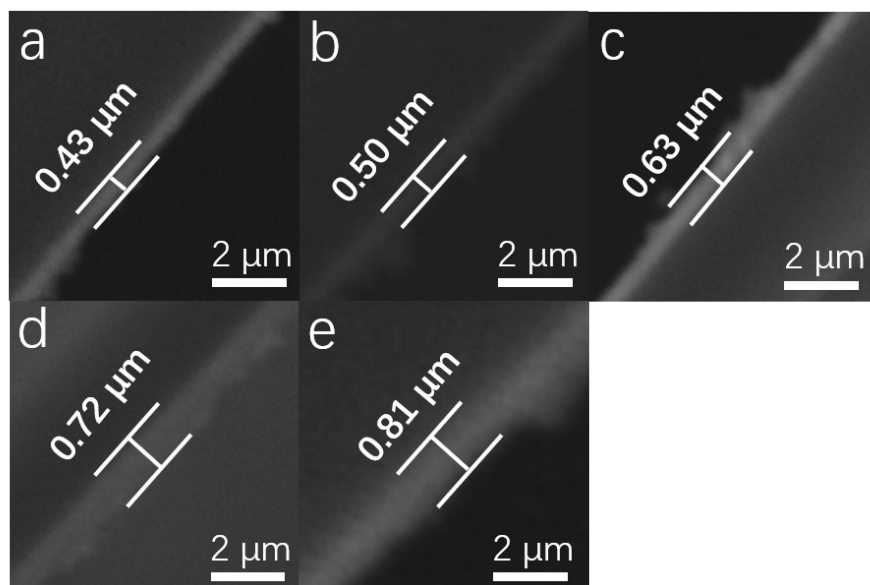

**Fig. S7** Cross-sectional SEM images of CdS/ITO films with different thicknesses.

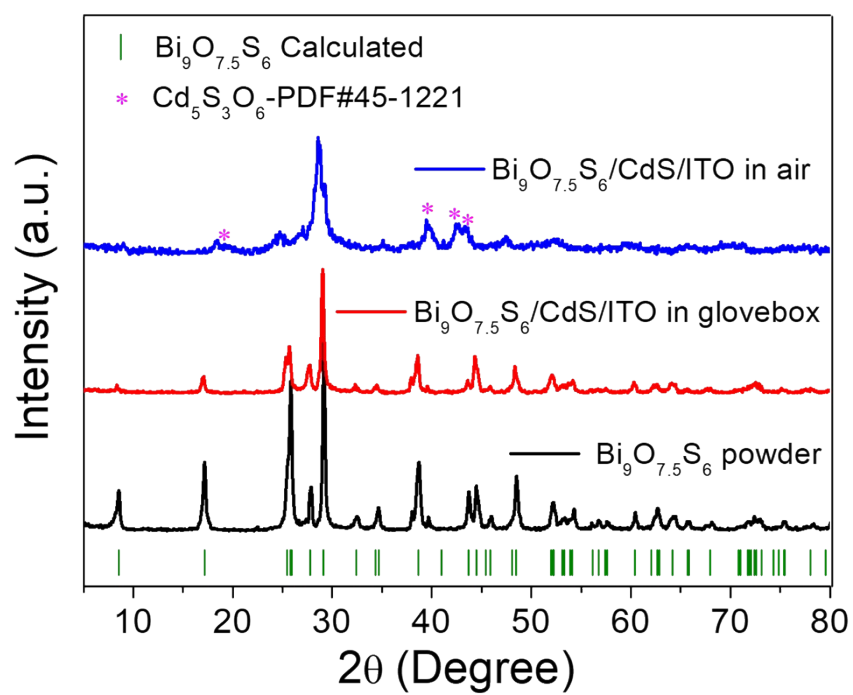

**Fig. S8** The XRD pattern of Bi<sub>9</sub>O<sub>7.5</sub>S<sub>6</sub>/CdS/ITO composite film after keeping in air and glove box respectively for 2 weeks.
